# Supplementary material
Source: publisher figshare collection journal article supplement (https://acs.figshare.com/ndownloader/files/4693969)
Supplement: Supplementary file 1 [file 4693969]

**Supporting Information for “The Sulfur Dioxide – 1-Butyl-3-Methylimidazolium  
Bromide Interaction: Drastic Changes in Structural and Physical Properties.”**

Rômulo A. Ando<sup>a</sup>, Leonardo J. A. Siqueira<sup>a</sup>, Fernanda C. Bazito<sup>b</sup>, Roberto M. Torresi<sup>a</sup>,

Paulo S. Santos<sup>a\*</sup>.

<sup>a</sup> Instituto de Química - Universidade de São Paulo // Instituto do Milênio de Materiais  
Complexos

Av. Prof. Lineu Prestes, 748 - São Paulo, SP05508-000, Brazil

<sup>b</sup> Departamento de Ciências Exatas e da Terra, Universidade Federal de São Paulo,  
Campus de Diadema, Diadema, São Paulo, Brazil

\* E-mail: [pssantos@quim.iq.usp.br](mailto:pssantos@quim.iq.usp.br)

## Materials

The 1-butyl-3-methylimidazolium bromide (BMIBr, 99%), 1-butyl-3-methylimidazolium bis(trifluoromethanesulfonyl)imide (BMITFSI, 99%) and N,N-butyl-methylpiperidinium bromide (BMPBr, 99%) were synthesized and purified by Fernanda C. Bazito. The 1-butyl-3-methylimidazolium chloride (BMICl, 99%) and 1-ethyl-3-methylimidazolium chloride (EMICl, 98%) were purchased from Solvent Innovations and sulfur dioxide (SO<sub>2</sub>, 99.9%) was purchased from White Martins. All the operations were undertaken in anaerobic dry conditions in a glove box.

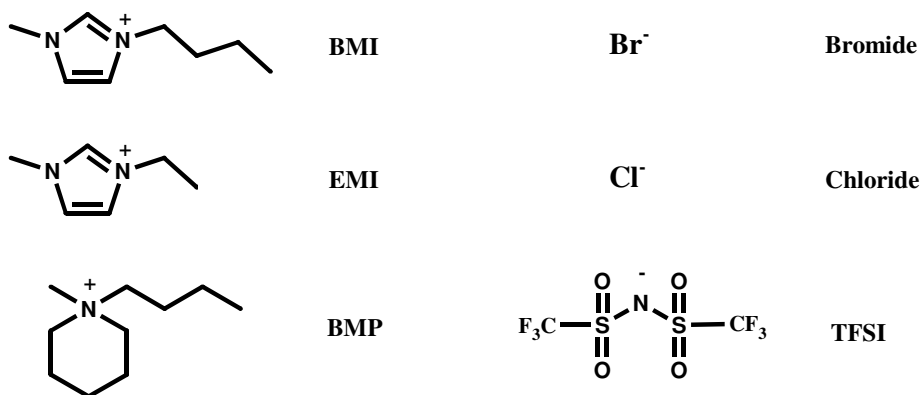

## Experimental

The relative molar concentration of BMIBr/SO<sub>2</sub> was systematically determined by acid/base titration, considering the follow equilibrium:

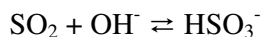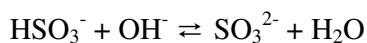

The Raman spectra were obtained in a RFS 100/S FT-Raman Bruker spectrometer with the 1064 nm radiation from an air-cooled diode-pumped Nd:YAG

laser. The laser beam was focused on the sample in backscattering geometry at ca. 300 mW of laser power.

Ionic conductivity ( $\sigma^{\text{exp}}$ ) was measured by the impedance method with the Autolab PGSTAT 30 (Eco Chemie) equipment within the frequency range 0.1 - 100 kHz. The cell constant was calibrated with KCl standard aqueous solution. The conductivity measurements of the neat BMIBr and BMIBr-SO<sub>2</sub> were done in the 5-95°C temperature range, describing a Vogel-Tammann-Fulcher (VTF) regime (equation 1):

$$\ln \sigma = \ln \sigma_0 - \frac{\beta}{T - T_0} \quad (1)$$

where  $\beta$  is a parameter related to the activation energy,  $T$  is the absolute temperature and  $T_0$  is the ideal glass transition temperature.

Viscosity ( $\eta$ ) and density ( $\rho$ ) measurements (at 50°C) were undertaken using Anton Paar Stabinger SVM 3000 and DMA 4500 equipments, respectively.

Diffusion coefficients ( $D$ ) of the BMI<sup>+</sup> was measured by pulsed gradient spin echo nuclear magnetic resonance (PGSE-NMR) in a Varian INOVA 500 MHz spectrometer equipped with a 5 mm Indirect Detection Probe (50 G cm<sup>-1</sup> max), calibrated with water,  $D = 2.299 \times 10^{-9} \text{ m}^2 \text{ s}^{-1}$  at 298 K. A stimulated spin-echo pulse sequence, i.e. 90° -  $\tau_1$  - 90° -  $\tau_2$  - 90° -  $\tau_1$  - acquisition, incorporating a gradient pulse in each  $\tau_1$  period was used. The echo attenuation was fit by the equation (2):

$$\ln \left( \frac{I}{I_0} \right) = - \gamma^2 g^2 \delta^2 D \left( \Delta - \frac{\delta}{3} \right) \quad (2)$$

where  $g$  is the gradient strength,  $I_o$  is the echo amplitude when  $g$  tends to zero,  $\gamma$  is the gyromagnetic ratio,  $\delta$  is the duration of the gradient pulse, and  $\Delta$  is the time between gradient pulses. Experiments were conducted with  $50 < \Delta < 150$  ms and  $\delta = 1 - 5$  ms.

The values of conductivities ( $\sigma^{NE}$ ) estimated by the diffusion coefficients were determined by the Nernst-Einstein equation:

$$\sigma^{NE} = \frac{q^2}{kT} (n_{cation} * D_{cation} + n_{anion} * D_{anion}) \quad (3)$$

where  $q$  is the electron charge ( $1.602 \times 10^{-19}$  C),  $k$  is the Boltzmann constant ( $1.38065 \times 10^{-23}$  J/K),  $T$  is the temperature,  $n$  is the number of ions and  $D$  is the diffusion coefficients. The conductivities were obtained considering the same values of diffusion coefficients for  $BMI^+$  and  $Br^-$ , since it was not possible to obtain the  $D_{Br^-}$  by the PGSE-NMR method.

## Molecular Dynamics Simulations

**Table I.** Computational details.

|                       | No. cation | No. anion | No. SO <sub>2</sub> | Temperature<br>(K) | Density              |
|-----------------------|------------|-----------|---------------------|--------------------|----------------------|
| BMIBr-SO <sub>2</sub> | 125        | 125       | 500                 | 330                | 1.36                 |
| BMIBr                 | 200        | 200       | -                   | 400                | 1.28                 |
|                       | Equil. Run |           | Prod. run           | Time step          | Long range<br>forces |
| BMIBr-SO <sub>2</sub> | 1ns        |           | 1ns                 | 5                  | Ewald<br>summation   |
| BMIBr                 | 1ns        |           | 2 ns                | 5                  | Ewald<br>summation   |

The intermolecular potential used was follow (equation 4):

$$U = \sum_{\substack{i,j \\ i < j}} \left\{ B_{ij} e^{-\alpha_{ij} r_{ij}} - \frac{C_{ij}}{r_{ij}^6} + \frac{q_i q_j}{r_{ij}} \right\} + \sum_{\text{bonds}} k_r (r - r_{eq})^2 + \sum_{\text{angles}} k_{\theta} (\theta - \theta_{eq})^2 + \sum_{\text{dihedrals}} \sum_{n=1}^3 k_{\psi,n} [1 + \cos(n\psi - \delta_n)] , \quad (4)$$

**Table II.** Parameters of intermolecular potential used in BMIBr and BMIBr-SO<sub>2</sub> simulations.

|                 | Epsilon<br>(10 <sup>-20</sup> J) | Sigma<br>(Å) | Charge<br>(e) |
|-----------------|----------------------------------|--------------|---------------|
| N1              | 0.71                             | 3.25         | -0.400        |
| N2              | 0.71                             | 3.25         | -0.394        |
| C3              | 0.443                            | 3.88         | 0.5999        |
| C4              | 0.443                            | 3.88         | 0.2516        |
| C5              | 0.443                            | 3.88         | 0.2243        |
| C6              | 0.865                            | 3.775        | 0.3448        |
| C7              | 0.493                            | 3.905        | 0.2671        |
| C8              | 0.493                            | 3.905        | 0.0327        |
| C9              | 0.493                            | 3.905        | 0.0374        |
| C10             | 0.326                            | 3.905        | 0.0358        |
| Br <sup>-</sup> | 0.09                             | 4.62         | -1.00         |
| S <sup>b</sup>  | 0.213                            | 3.585        | 0.467         |
| O <sup>b</sup>  | 0.086                            | 2.993        | 0.235         |

<sup>a</sup> S. M. Urahata, M. C. C. Ribeiro, *J. Chem. Phys.* 120, 1855 (2004).

<sup>b</sup> In SO<sub>2</sub> bonds and angle were kept rigid by rattle constraint, LJ parameters were taken from Ribeiro, M.C.C., *J. Phys. Chem. B*, XXX.

**Table III.** Parameters of intramolecular potential used in the simulation of BMIBr and BMIBr-SO<sub>2</sub>.<sup>a</sup>

|                                                                               | $k_b$<br>(kJ/mol Å <sup>-2</sup> )   | $r_{eq}$<br>(Å) |                                                  | $k_\theta$<br>(kJ mol <sup>-1</sup> rad <sup>-2</sup> ) | $\theta_{eq}$ |
|-------------------------------------------------------------------------------|--------------------------------------|-----------------|--------------------------------------------------|---------------------------------------------------------|---------------|
| N1-C3                                                                         | 1674.7                               | 1.34            | N1-C3-N2                                         | 544.3                                                   | 109.1         |
| N2-C3                                                                         | 1674.7                               | 1.34            | C3-N2-C7                                         | 544.3                                                   | 125.9         |
| N1-C4                                                                         | 1674.7                               | 1.38            | C5-N2-C7                                         | 544.3                                                   | 125.9         |
| N2-C5                                                                         | 1674.7                               | 1.38            | C3-N1-C5                                         | 544.3                                                   | 108.3         |
| N1-C6                                                                         | 921.1                                | 1.47            | C3-N1-C4                                         | 544.3                                                   | 108.3         |
| N2-C7                                                                         | 921.1                                | 1.48            | N2-C5-C4                                         | 544.3                                                   | 107.2         |
| C4-C5                                                                         | 1716.6                               | 1.36            | N1-C4-C5                                         | 544.3                                                   | 107.2         |
| C7-C8                                                                         | 837.4                                | 1.53            | C3-N1-C6                                         | 544.3                                                   | 125.8         |
| C <sub>i</sub> -C <sub>i+1</sub> (i>8)                                        | 931.6                                | 1.53            | C4-N1-C6                                         | 544.3                                                   | 125.8         |
|                                                                               |                                      |                 | N2-C7-C8                                         | 586.2                                                   | 112.6         |
|                                                                               |                                      |                 | C <sub>i</sub> C <sub>i+1</sub> C <sub>i+2</sub> | 244.5                                                   | 111.6         |
|                                                                               | $k_{\psi,n}$ (kJ mol <sup>-1</sup> ) | $N$             | $\delta$ (degree)                                |                                                         |               |
| C6-N1-C4-C5                                                                   | 58.6                                 | 1               | 0                                                |                                                         |               |
| C7-N2-C5-C4                                                                   | 58.6                                 | 1               | 0                                                |                                                         |               |
| C7-N2-C3-N1                                                                   | 58.6                                 | 1               | 0                                                |                                                         |               |
| C6-N1-C3-N2                                                                   | 58.6                                 | 1               | 0                                                |                                                         |               |
| C5-N2-C3-N1                                                                   | 58.6                                 | 2               | 180                                              |                                                         |               |
| N2-C3-N1-C4                                                                   | 58.6                                 | 2               | 180                                              |                                                         |               |
| N2-C5-C4-N1                                                                   | 58.6                                 | 2               | 180                                              |                                                         |               |
| C4-C5-N2-C3                                                                   | 58.6                                 | 2               | 180                                              |                                                         |               |
| C3-N1-C4-C5                                                                   | 58.6                                 | 2               | 180                                              |                                                         |               |
| C3-N2-C7-C8                                                                   | 0.42                                 | 1               | 180                                              |                                                         |               |
| C5-N2-C7-C8                                                                   | 0.84                                 | 1               | 0                                                |                                                         |               |
| C <sub>i</sub> -C <sub>i+1</sub> -C <sub>i+2</sub> -C <sub>i+3</sub><br>(i>6) | 0.63                                 | 1               | 0                                                |                                                         |               |

<sup>a</sup> S. M. Urahata, M. C. C. Ribeiro, *J. Chem. Phys.* 120, 1855 (2004).

### ***Ab initio* Calculations**

*Ab initio* calculations were performed in a cluster comprising 4 SO<sub>2</sub> molecules and 1 Br<sup>-</sup> by using DFT methods with functional B3LYP and basis set 6-31+G\*.
